# Supplementary material
Source: publisher figshare collection journal article supplement (https://frontiersin.figshare.com/ndownloader/files/12713678)
Supplement: Supplementary file [file 12713678]

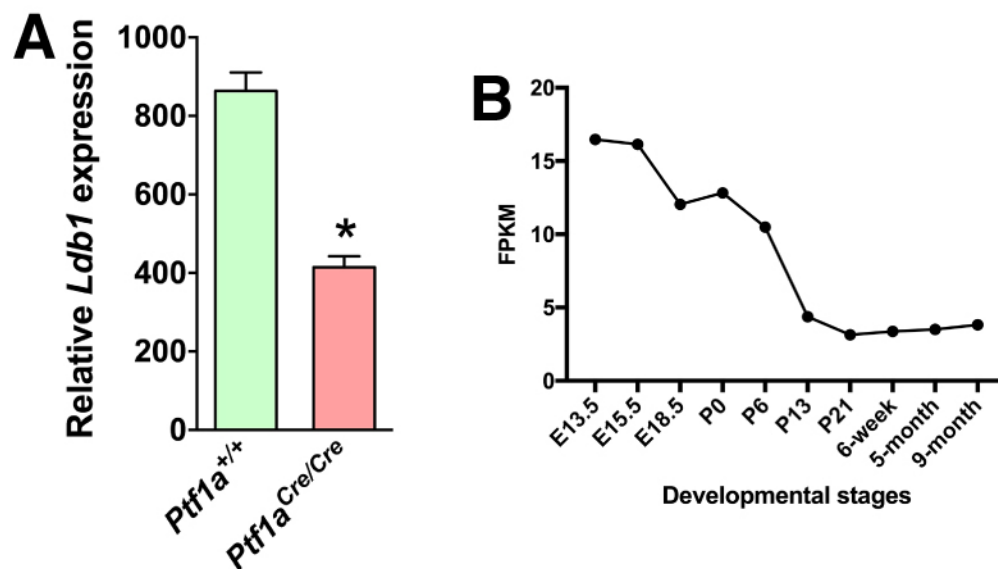

**Figure S1** *Ldb1* expression in wildtype and *Ptf1a* mutant retinas. **(A)** Microarray analysis revealed that *Ldb1* expression was significantly downregulated in the *Ptf1a* mutant retina when compared to the wildtype. \* $p < 0.0001$ . **(B)** Temporal expression levels (FPKM) of *Ldb1* in developing and mature wildtype retinas as determined by RNA-seq analysis.

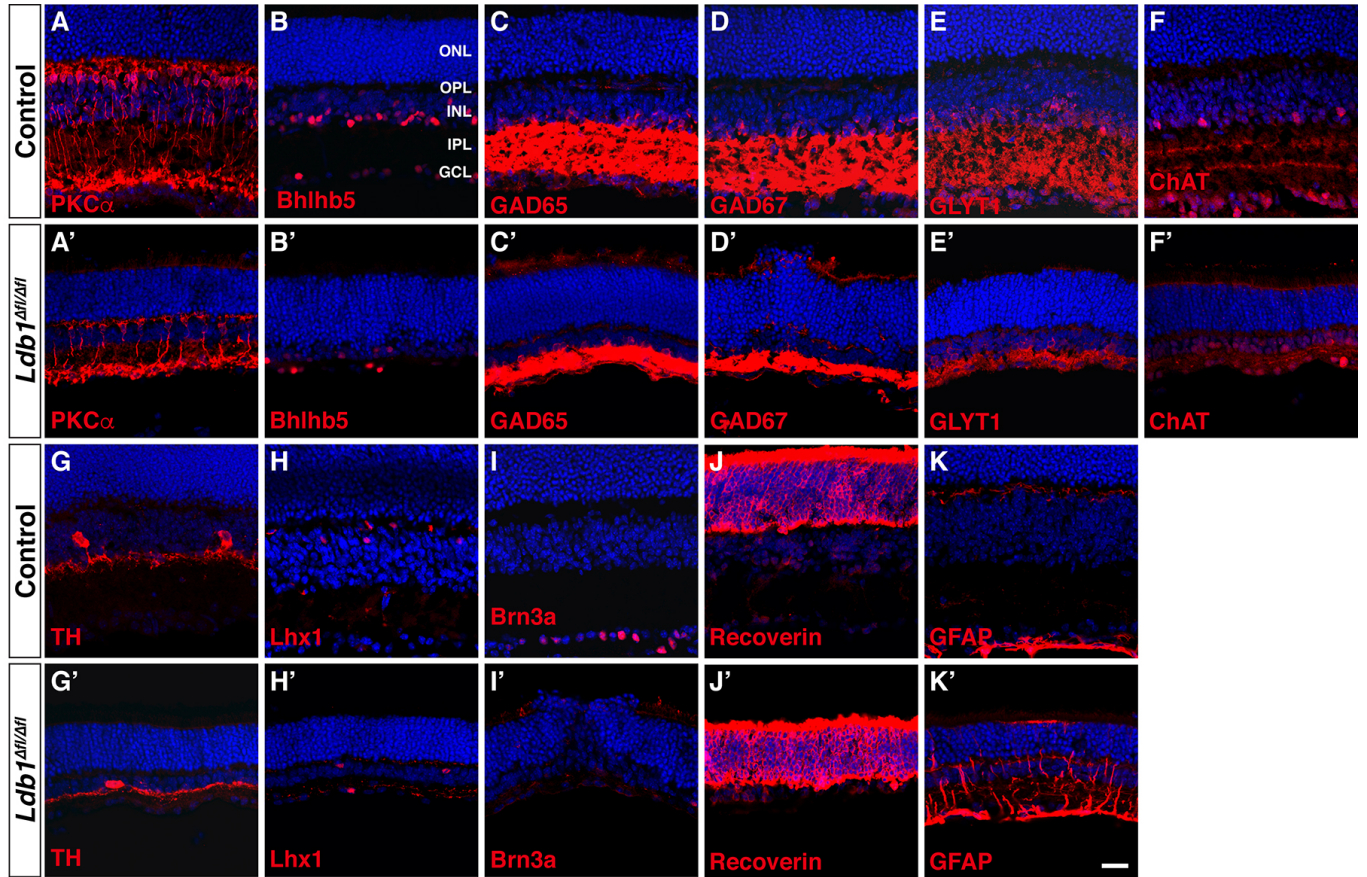

**Figure S2** Effect of *Ldb1* inactivation on different retinal cell types. (A,A') PKC $\alpha$ <sup>+</sup> rod bipolar cells were decreased in the mutant retina. (B,B') Bhlhb5<sup>+</sup> cone bipolar and GABAergic amacrine cells were reduced in the mutant. (C-G,C'-G') The amacrine subtypes including GAD65<sup>+</sup> or GAD67<sup>+</sup> GABAergic, GLYT1<sup>+</sup> glycinergic, ChAT<sup>+</sup> cholinergic, and TH<sup>+</sup> dopaminergic amacrine cells, were all decreased in the mutant. (H,I,H',I') The early-born retinal cell types, such as Lhx1<sup>+</sup> horizontal cells and Brn3a<sup>+</sup> ganglion cells, were also reduced in P21 mutant retinas. (J,J') Recoverin<sup>+</sup> photoreceptors were decreased in the mutant retina. (K,K') GFAP<sup>+</sup> cells were greatly increased in the GCL and INL in the mutant. Abbreviations: GCL, ganglion cell layer; INL, inner nuclear layer; IPL, inner plexiform layer; ONL, outer nuclear layer; and OPL, outer plexiform layer. Scale bar: A-K, A'-K', 20  $\mu$ m.

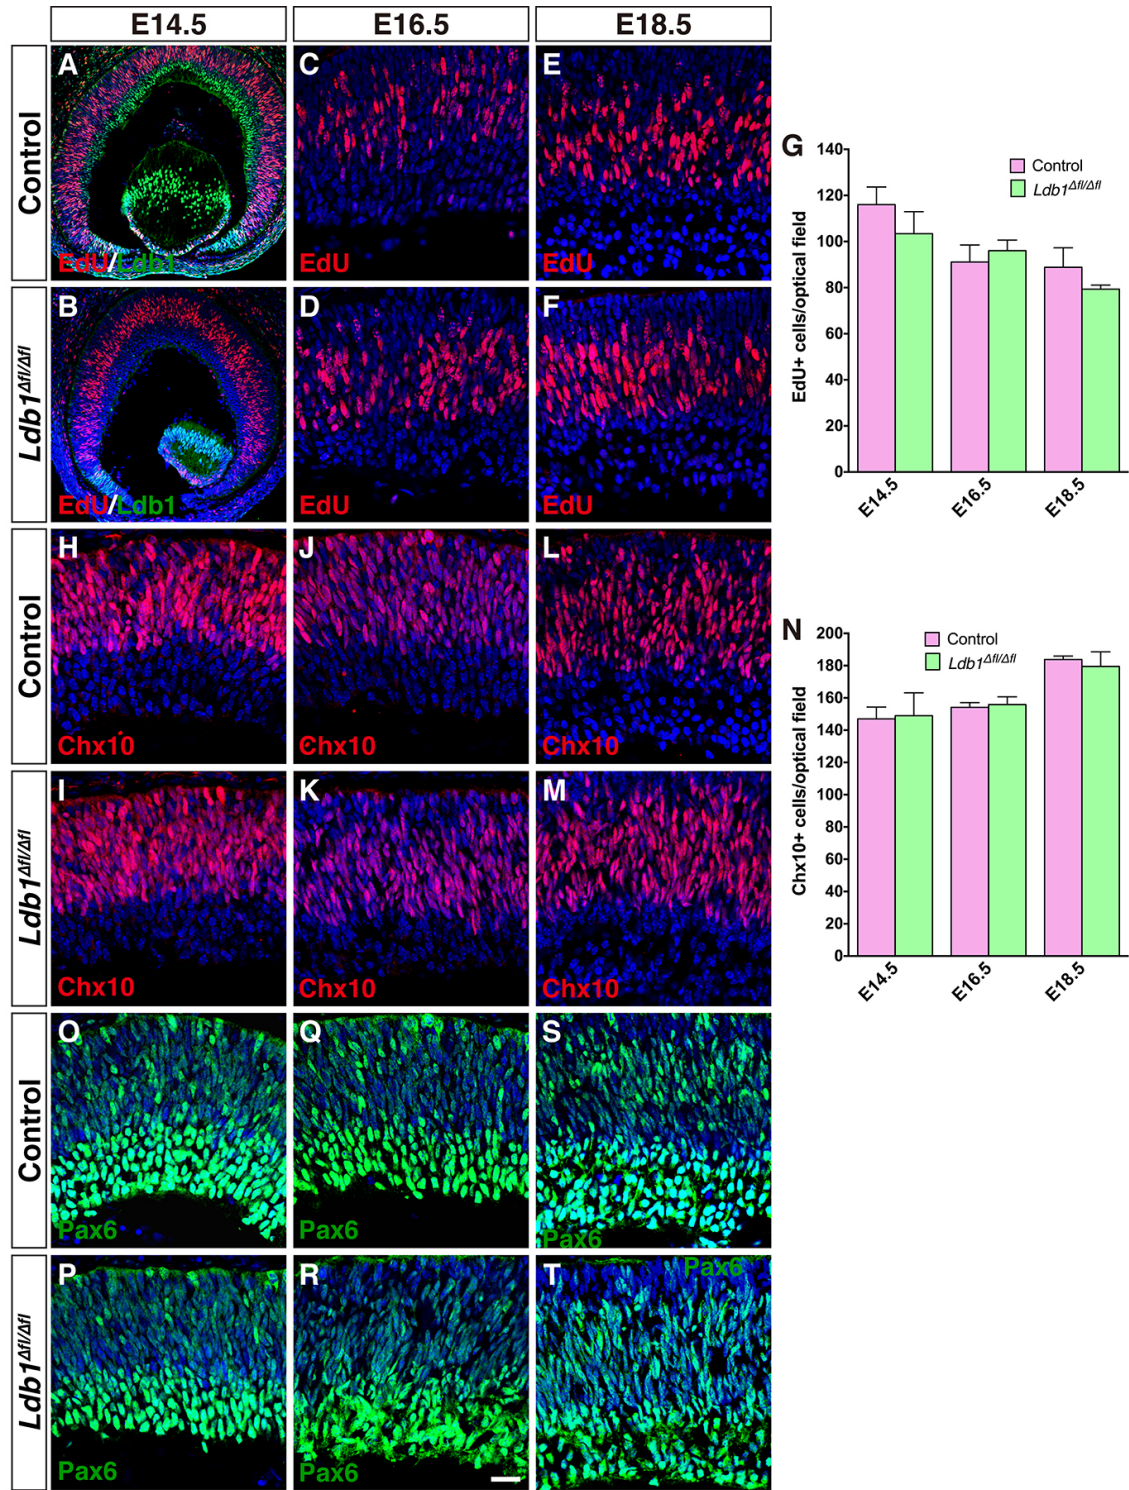

**Figure S3** Effect of *Ldb1* inactivation on retinal progenitor cells at embryonic stages. (A-F) Retinal sections from E14.5, E16.5 and E18.5 control and *Ldb1<sup>Δfl/Δfl</sup>* embryos pulse-labeled by EdU were color-labeled for EdU and/or immunostained with an anti-Ldb1 antibody. (G) Quantitation of EdU<sup>+</sup> dividing cells in control and *Ldb1<sup>Δfl/Δfl</sup>* retinas. Each histogram represents the mean±SD for three retinas. (H-M) E14.5, E16.5 and E18.5 control and *Ldb1<sup>Δfl/Δfl</sup>* retinal sections were immunostained with an anti-Chx10 antibody. (N) Quantitation of Chx10<sup>+</sup> cells in control and *Ldb1<sup>Δfl/Δfl</sup>* retinas. Each histogram represents the mean±SD for three retinas. (O-T) E14.5, E16.5 and E18.5 control and *Ldb1<sup>Δfl/Δfl</sup>* retinal sections were immunostained with an anti-Pax6 antibody. All sections were counterstained with nuclear DAPI. Scale bar: A,B, 40 μm; C-F,H-M,O-T, 20 μm.



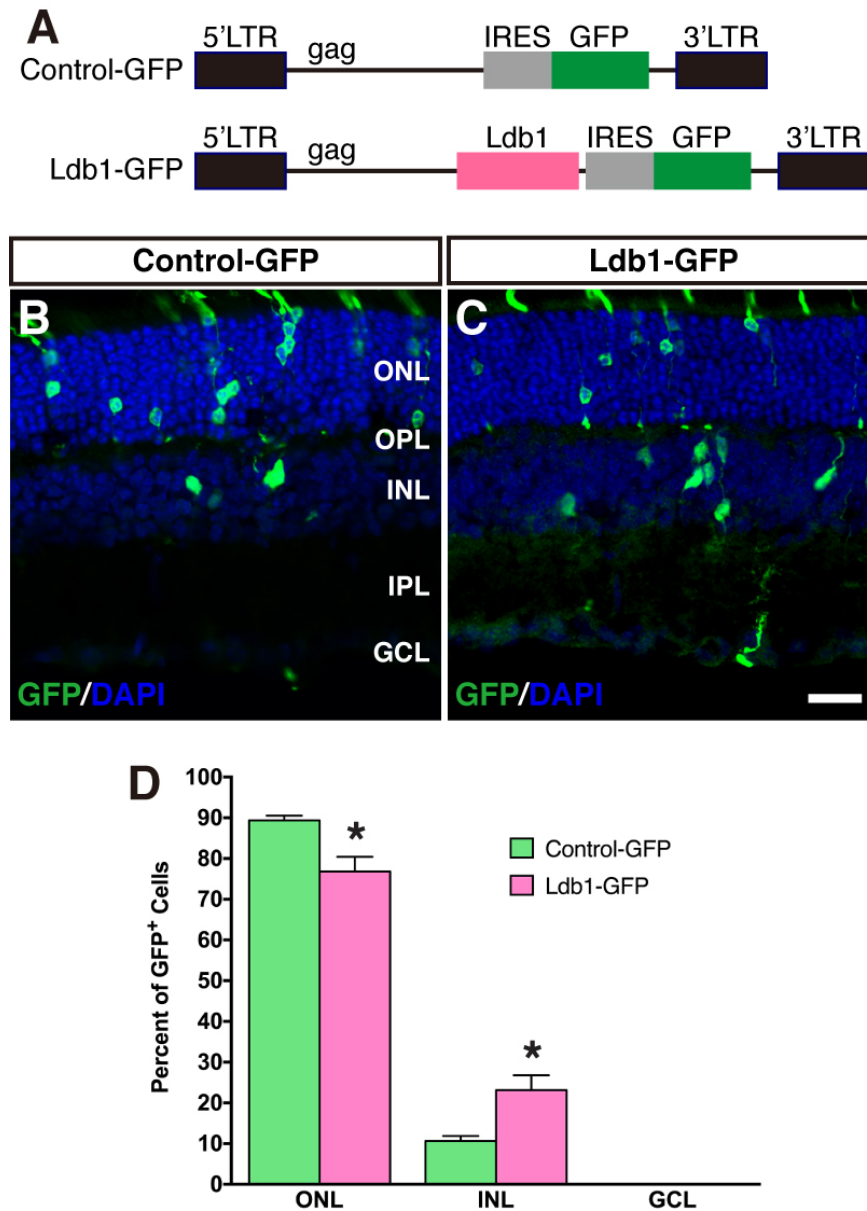

**Figure S4** Expression patterns of the Ldb1-GFP and control-GFP retroviruses in the retina. **(A)** A schema to show the structures of the Ldb1-GFP and control-GFP retroviral constructs. **(B,C)** Retroviruses were injected into the subretinal space at P0. Retinal samples were collected at P21 for analysis. The representative retinal sections show that there are relatively more GFP<sup>+</sup> cells (green) migrated into the INL when infected with the Ldb1-GFP viruses. Cells were counterstained with DAPI (blue). **(D)** Quantification of the percentage (means  $\pm$  SD) of GFP<sup>+</sup> cells within the ONL, INL and GCL in retinas infected with the control-GFP or Ldb1-GFP retroviruses. Three retinas were scored for each virus and more than 1230 GFP<sup>+</sup> cells were counted in each retina. \* $p < 0.005$ . Abbreviations: GCL, ganglion cell layer; INL, inner nuclear layer; IPL, inner plexiform layer; ONL, outer nuclear layer; and OPL, outer plexiform layer. Scale bar: B,C, 20  $\mu$ m.

**Table S1.** Retinal cell types and subtypes immunolabeled by specific antibodies.

**Table S2.** Gene-specific primer sequences used for qRT-PCR analysis.

**Table S3.** List of genes differentially expressed between P0 control and *Ldb1* mutant retinas as determined by RNA-seq analysis.
